# Supplementary material for: A glutathione responsive pyrrolopyrrolidone nanotheranostic agent for turn-on fluorescence imaging guided photothermal/photodynamic cancer therapy
Source: Royal Society of Chemistry journal article supplement (doi:10.1039/c9qm00471h), 2019-01-01
Supplement: c9qm00471h1.pdf [file c9qm00471h1.pdf]

# **Glutathione Responsive Pyrrolopyrrolidone Nanotheranostic Agent for Turn-on Fluorescence Imaging Guided Photothermal/Photodynamic Cancer Therapy**

Jianhua Zou,<sup>a</sup> Lei Xue,<sup>a</sup> Nan Yang,<sup>a</sup> Yanfang Ren,<sup>b</sup> Zhe Fan,<sup>c</sup> Wenjun Wang,<sup>b</sup> Weili Si,<sup>a\*</sup>  
Yewei Zhang,<sup>c\*</sup> Wei Huang,<sup>a,d,e</sup> Xiaochen Dong<sup>a\*</sup>

<sup>a</sup>Key Laboratory of Flexible Electronics (KLOFE) & Institute of Advanced Materials (IAM),  
Nanjing Tech University (NanjingTech), 30 South Puzhu Road, Nanjing, 211800, China.

*E-mail: iamxcdong@njtech.edu.cn; iamwlsi@njtech.edu.cn*

<sup>b</sup>School of Physical Science and Information Technology, Liaocheng University, Liaocheng  
252059, China.

<sup>c</sup>Department of Hepatobiliary and Pancreatic Surgery, Zhongda Hospital, Medical School,  
Southeast University, Nanjing 210009, China.

*Email: zhangyewei@njmu.edu.cn*

<sup>d</sup>School of Chemistry and Materials Science, Nanjing University of Information Science &  
Technology, Nanjing, 210044, China

<sup>e</sup>Shaanxi Institute of Flexible Electronics (SIFE), Northwestern Polytechnical University  
(NPU), 127 West Youyi Road, Xi'an 710072, China



For DPPBPh,  $^1\text{H}$  NMR ( $\text{CDCl}_3$ , 400 MHz):  $\delta$  (ppm) 9.00-8.96 (2H, d), 7.93-7.86 (4H, d), 7.85-7.81 (4H, d), 7.80-7.74 (4H, d), 7.63-7.57 (4H, m), 7.55-7.48 (4H, m), 4.16-4.03 (4H, d), 1.47-1.26 (16H, m), 0.96-0.85 (12H, m).  $^{13}\text{C}$  NMR (75 MHz,  $\text{CDCl}_3$ ):  $\delta$  161.89, 136.68, 132.76, 130.89, 129.75, 128.61, 125.95, 46.06, 39.31, 30.31, 29.67, 28.57, 23.55, 23.01, 14.03, 10.58. MS (ESI): calcd.  $m/z$  = 980.39; found  $m/z$  = 980.78.

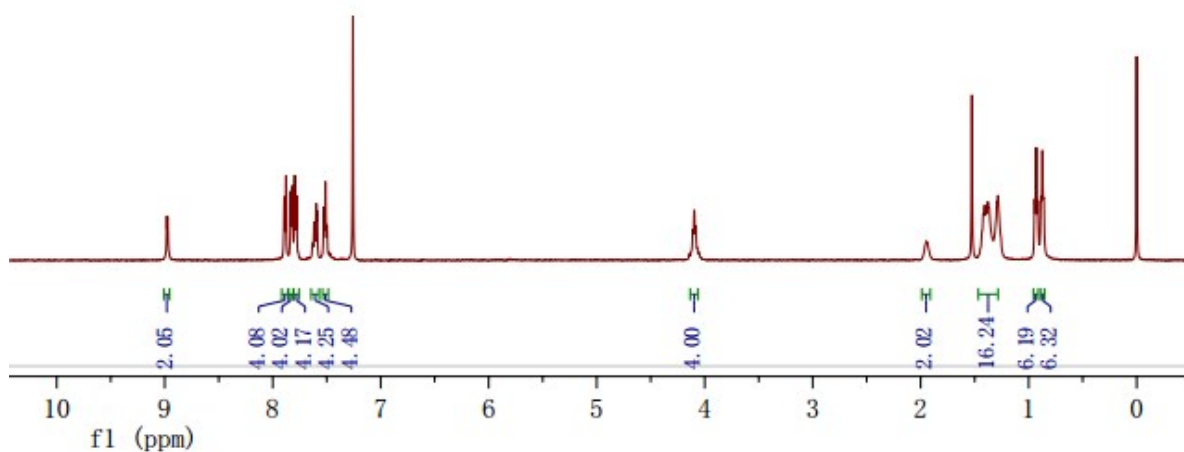

Figure S2.  $^1\text{H}$ NMR of DPPBPh in  $\text{CDCl}_3$

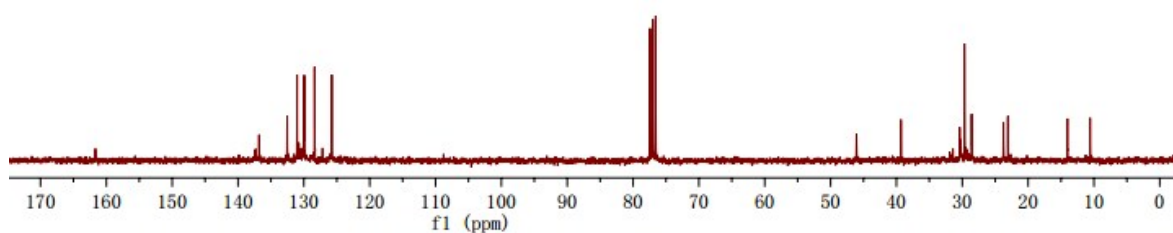

Figure S3.  $^{13}\text{C}$ NMR of DPPBPh in  $\text{CDCl}_3$

For DPPTPh,  $^1\text{H}$  NMR ( $\text{CDCl}_3$ , 400 MHz):  $\delta$  (ppm) 9.00-8.96 (2H, d), 7.93-7.86 (6H, d), 7.85-7.81 (6H, d), 7.80-7.74 (6H, d), 7.63-7.57 (6H, m), 7.55-7.48 (6H, t), 4.11-4.07 (4H, d), 1.97-1.92 (2H, s), 1.47-1.32 (16H, m), 0.94-0.85 (12H, m).  $^{13}\text{C}$  NMR (75 MHz,  $\text{CDCl}_3$ )  $\delta$  161.73, 147.98, 139.33, 136.79, 132.54, 131.03, 129.93, 128.16, 125.74, 46.23, 38.98, 30.24, 28.38, 23.75, 23.07, 14.03, 10.46. MS (ESI): calcd.  $m/z$  = 1082.46; found  $m/z$  = 1081.95.

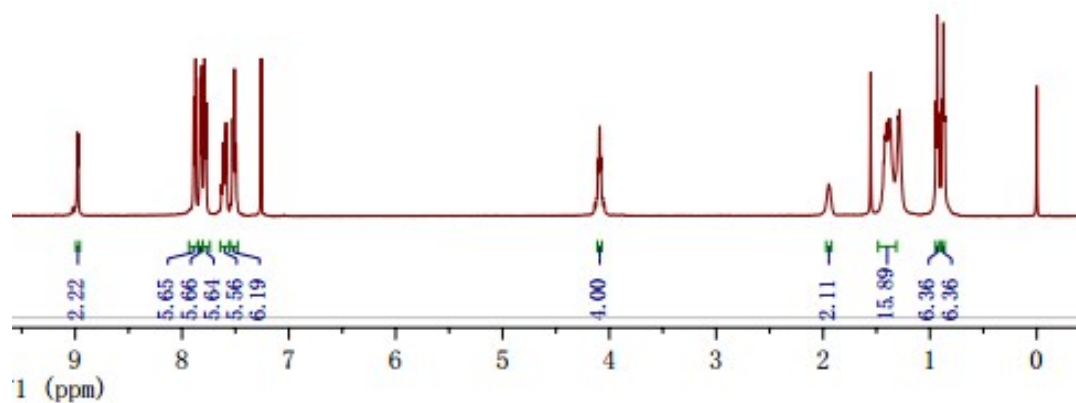

Figure S4.  $^1\text{H}$ NMR of DPPTPh in  $\text{CDCl}_3$

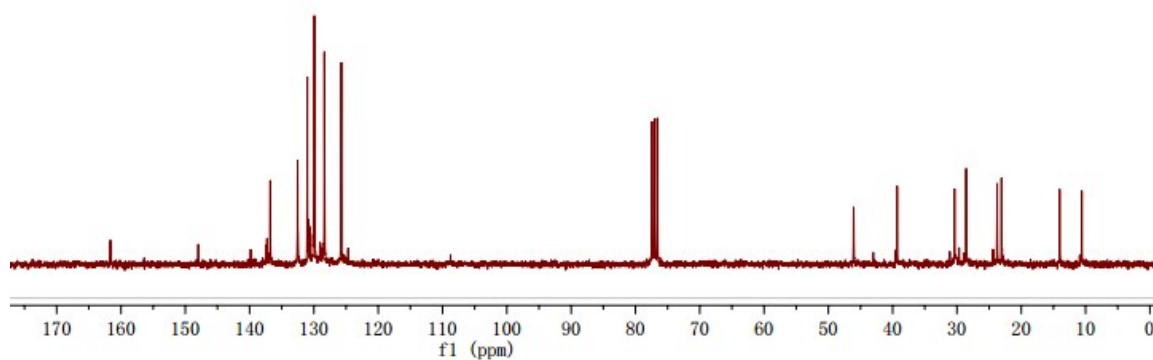

Figure S5.  $^{13}\text{C}$ NMR of DPPTPh in  $\text{CDCl}_3$

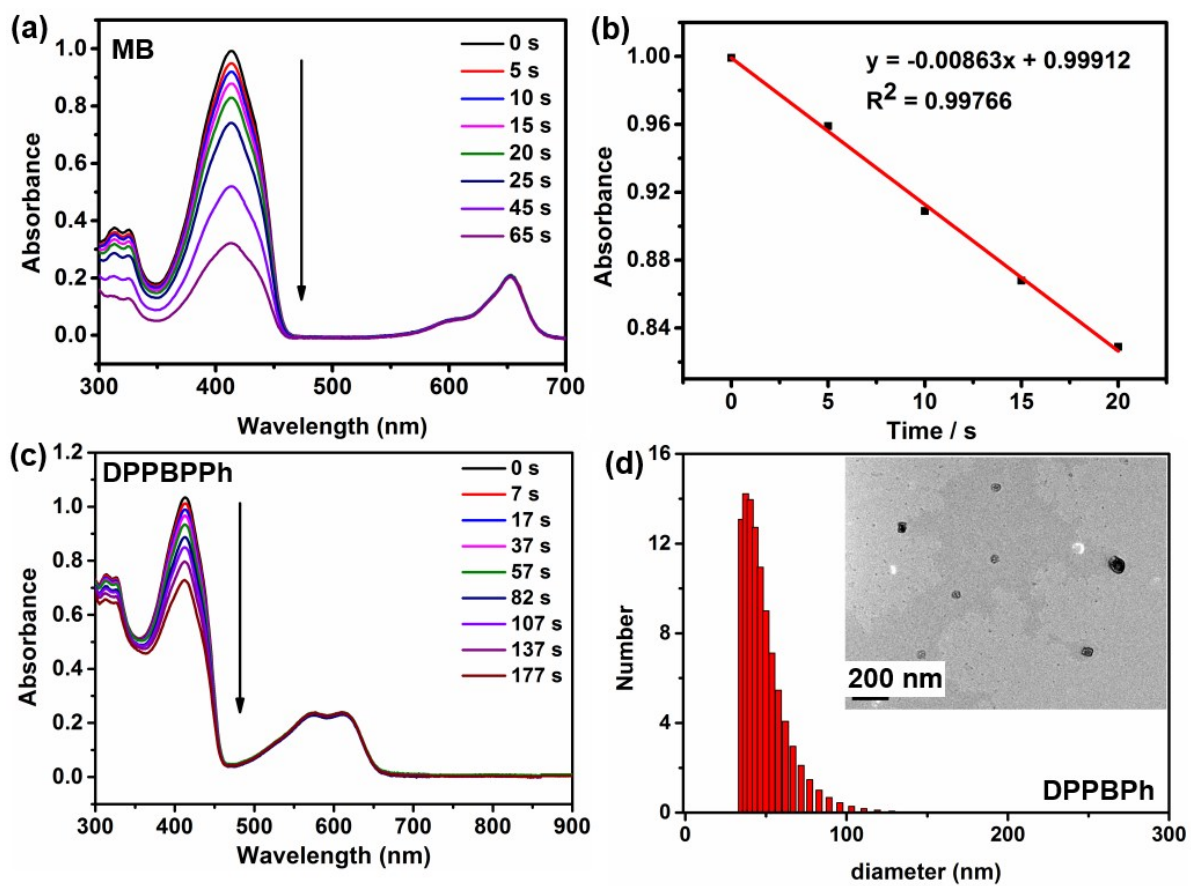

Figure S6. (a) Degradation of DPBF in the presence of MB in DCM with irradiation. (b) Linear fitting of the degradation of DPBF. (c) Degradation of DPBF in the presence of DPPBPh in DCM with irradiation. (d) DLS and TEM of DPPBPh NPs in water.

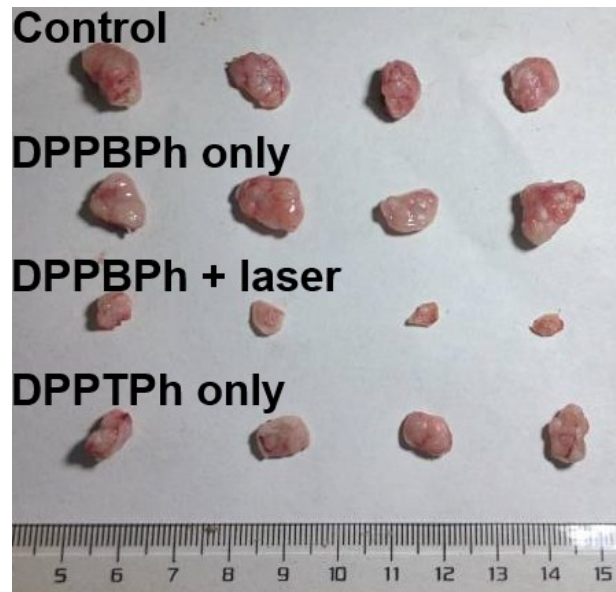

Figure S7. Pictures of tumors from mice in the control, DPPBPh, DPPBPh+laser, DPPTPh and DPPTPh+laser groups.
